# Supplementary material
Source: MDPI journal article supplement (https://www.mdpi.com/2311-5637/9/7/695)
Supplement: s1 [file s1 › fermentation-2475110-supplementary.pdf]

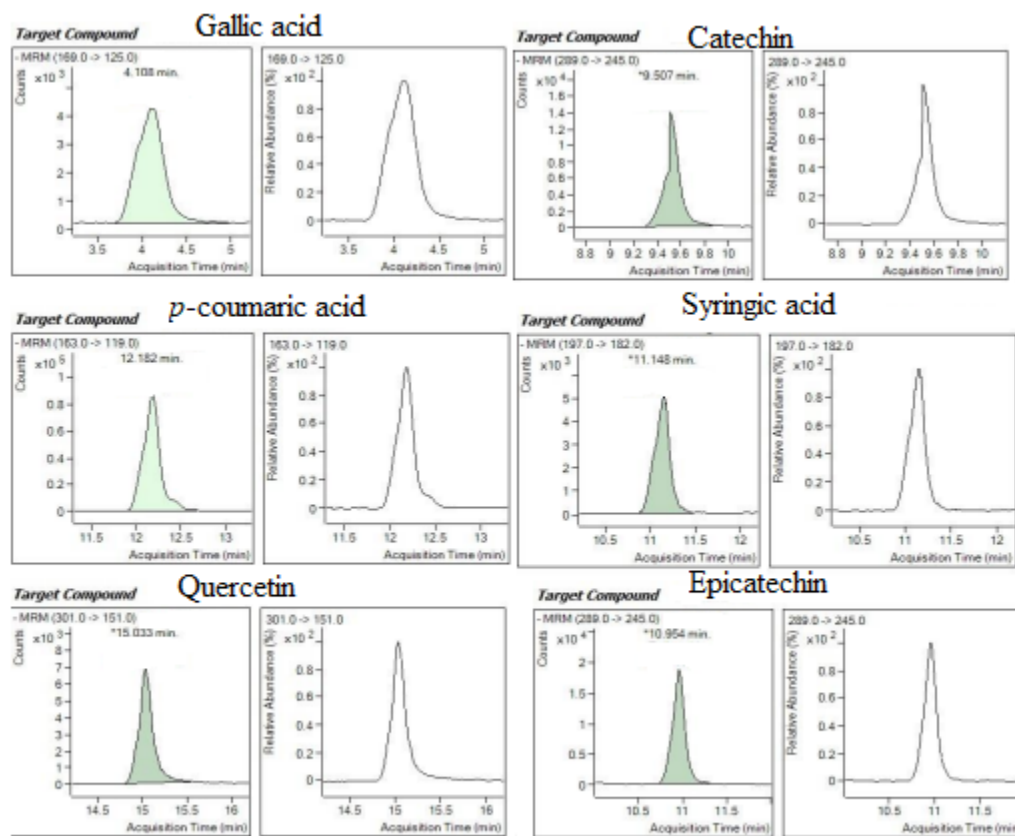

**Figure S1.** Chromatograms of identified phenolic compounds.

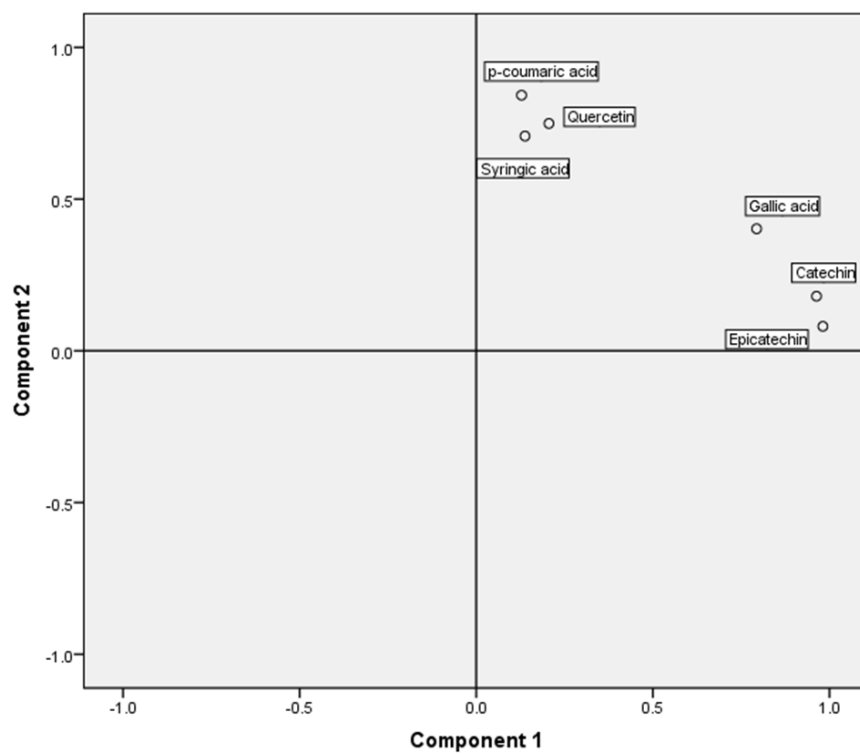

**Figure S2.** Loading plots of phenolic compounds detected in wine.

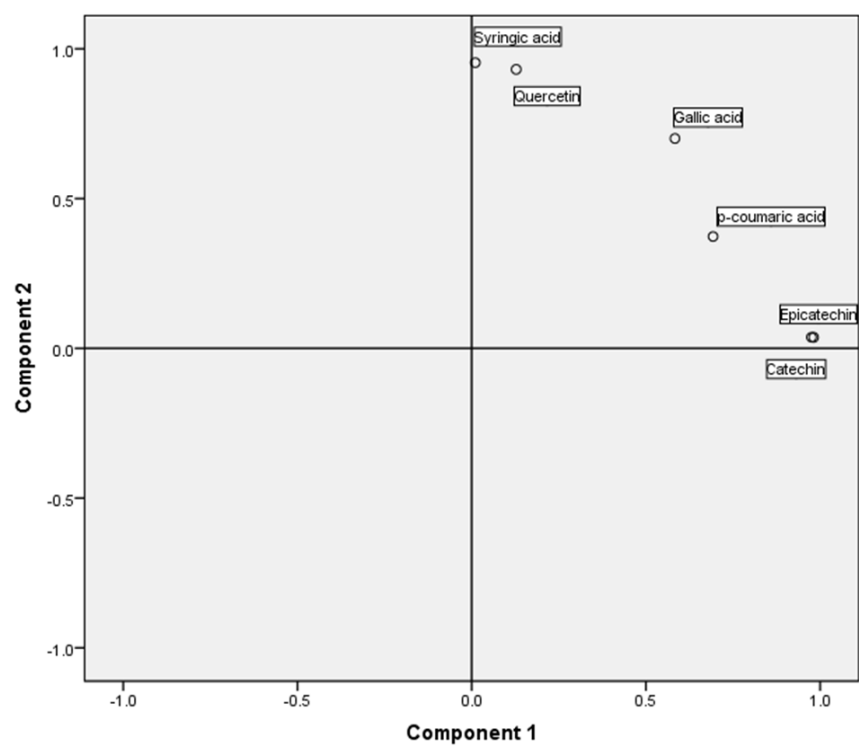

**Figure S3.** Loading plots of phenolic compounds detected in FP.
